# Supplementary material
Source: PubMed Central journal article supplement (PMC8558275)
Supplement: 127_2021_2105_MOESM1_ESM.pdf [file 127_2021_2105_MOESM1_ESM.pdf]

## Supplementary material

Table S1 Descriptive statistics (% or mean and standard deviation (SD)) before and after weighting

|                                     | Raw<br>%/Mean (SD) | Weighted<br>%/Mean (SD) |
|-------------------------------------|--------------------|-------------------------|
| Age: 18-29                          | 6.52%              | 19.47%                  |
| Age: 30-45                          | 26.15%             | 26.06%                  |
| Age: 46-59                          | 32.08%             | 24.14%                  |
| Age: 60+                            | 35.25%             | 30.33%                  |
| Women (VS. men)                     | 74.86%             | 50.68%                  |
| Ethnic minority (VS. white)         | 3.94%              | 12.78%                  |
| Education: low                      | 12.84%             | 32.58%                  |
| Education: medium                   | 16.73%             | 33.81%                  |
| Education: high                     | 70.43%             | 33.61%                  |
| Employed (VS. Not employed)         | 62.08%             | 57.34%                  |
| Income <30k (VS. ≥30k)              | 38.74%             | 47.68%                  |
| Rural (VS. urban)                   | 24.28%             | 20.58%                  |
| Living alone                        | 21.04%             | 18.98%                  |
| Living with children                | 24.09%             | 24.36%                  |
| Living with others, no child        | 54.87%             | 56.66%                  |
| Close friends <3 (VS. ≥3)           | 24.76%             | 30.60%                  |
| Loneliness                          | 4.79 (1.88)        | 4.98 (1.99)             |
| Mental health diagnosis (VS. none)  | 17.24%             | 20.19%                  |
| Depression (PHQ-9)                  | 6.16 (5.56)        | 6.85 (6.18)             |
| Anxiety (GAD-7)                     | 4.70 (4.96)        | 5.15 (5.44)             |
| Coping: problem-focused             | 0.09 (0.50)        | 0.01 (0.50)             |
| Coping: emotion-focused             | 0.10 (0.65)        | 0.01 (0.66)             |
| Coping: avoidant                    | 0.01 (0.52)        | 0.04 (0.55)             |
| Coping: socially-supported          | 0.13 (0.67)        | 0.02 (0.69)             |
| Personality: openness to Experience | 0.08 (0.58)        | 0.00 (0.58)             |
| Personality: conscientiousness      | 0.07 (0.69)        | -0.01 (0.71)            |
| Personality: extraversion           | 0.06 (0.70)        | 0.00 (0.71)             |
| Personality: agreeableness          | 0.01 (0.36)        | -0.01 (0.37)            |
| Personality: neuroticism            | -0.05 (0.67)       | 0.00 (0.70)             |

Table S2 Percentages of people using each strategy by characteristic groups (weighted)

|                                             | MED <sup>1</sup> | MH <sup>2</sup> | GP <sup>3</sup> | HL <sup>4</sup> | SFC <sup>5</sup> | FAM <sup>6</sup> |
|---------------------------------------------|------------------|-----------------|-----------------|-----------------|------------------|------------------|
| Age: 18-29                                  | 21.7%            | 17.9%           | 12.6%           | 14.6%           | 65.3%            | 69.1%            |
| Age: 30-45                                  | 22.4%            | 10.3%           | 8.8%            | 10.7%           | 53.0%            | 55.5%            |
| Age: 46-59                                  | 23.8%            | 6.8%            | 7.5%            | 7.3%            | 40.3%            | 41.0%            |
| Age: 60+                                    | 13.3%            | 2.2%            | 3.2%            | 3.1%            | 22.4%            | 22.5%            |
| Male                                        | 15.9%            | 6.1%            | 6.1%            | 6.4%            | 30.3%            | 33.1%            |
| Female                                      | 23.7%            | 10.7%           | 8.9%            | 10.1%           | 55.4%            | 55.9%            |
| White                                       | 20.4%            | 8.1%            | 7.3%            | 7.5%            | 41.7%            | 43.7%            |
| Ethnic minority                             | 16.2%            | 11.3%           | 8.7%            | 13.5%           | 52.1%            | 51.1%            |
| Education: low                              | 22.7%            | 5.9%            | 6.8%            | 5.8%            | 28.3%            | 32.2%            |
| Education: medium                           | 21.6%            | 9.7%            | 9.6%            | 10.6%           | 43.3%            | 46.5%            |
| Education: high                             | 15.3%            | 9.8%            | 6.1%            | 8.4%            | 57.0%            | 54.9%            |
| Not employed                                | 23.4%            | 9.4%            | 9.4%            | 9.3%            | 38.0%            | 38.6%            |
| Employed                                    | 17.2%            | 7.8%            | 6.1%            | 7.6%            | 46.7%            | 49.2%            |
| Income ≥30k                                 | 14.3%            | 7.5%            | 5.7%            | 6.9%            | 45.5%            | 47.0%            |
| Income <30k                                 | 25.9%            | 9.6%            | 9.6%            | 9.9%            | 40.3%            | 42.1%            |
| Urban                                       | 19.9%            | 8.8%            | 7.8%            | 8.7%            | 44.0%            | 46.2%            |
| Rural                                       | 19.6%            | 7.4%            | 6.3%            | 6.7%            | 39.1%            | 38.8%            |
| Living alone                                | 24.3%            | 10.4%           | 9.0%            | 8.9%            | 41.3%            | 42.4%            |
| Living with children                        | 21.0%            | 8.4%            | 8.4%            | 9.5%            | 44.9%            | 50.2%            |
| Living with others, no child                | 17.9%            | 7.9%            | 6.6%            | 7.6%            | 42.8%            | 43.0%            |
| Close friend <3                             | 17.2%            | 7.9%            | 6.8%            | 7.9%            | 44.9%            | 47.5%            |
| Close friend ≥3                             | 25.9%            | 9.8%            | 9.2%            | 9.2%            | 38.8%            | 38.2%            |
| Loneliness <6                               | 12.9%            | 4.1%            | 3.6%            | 4.0%            | 36.6%            | 38.2%            |
| Loneliness ≥6                               | 31.2%            | 15.7%           | 14.0%           | 15.4%           | 53.7%            | 55.3%            |
| No mental health diagnosis                  | 7.0%             | 3.9%            | 3.6%            | 4.4%            | 37.4%            | 38.3%            |
| Mental health diagnosis                     | 70.7%            | 26.4%           | 22.9%           | 23.6%           | 65.4%            | 69.8%            |
| PHQ <10                                     | 11.8%            | 4.3%            | 3.3%            | 4.0%            | 38.1%            | 37.3%            |
| PHQ ≥10                                     | 40.5%            | 19.1%           | 18.3%           | 19.4%           | 55.7%            | 63.7%            |
| GAD <10                                     | 14.3%            | 4.9%            | 4.0%            | 4.8%            | 38.8%            | 38.8%            |
| GAD ≥10                                     | 42.5%            | 23.2%           | 22.0%           | 22.9%           | 60.3%            | 68.6%            |
| Coping: problem-focused (low)†              | 19.0%            | 6.9%            | 6.2%            | 6.1%            | 31.0%            | 34.6%            |
| Coping: problem-focused (high)†             | 20.8%            | 10.4%           | 9.1%            | 10.9%           | 57.2%            | 56.5%            |
| Coping: emotion-focused (low)†              | 19.5%            | 7.6%            | 7.7%            | 7.4%            | 33.6%            | 37.7%            |
| Coping: emotion-focused (high)†             | 20.2%            | 9.6%            | 7.3%            | 9.5%            | 55.0%            | 53.5%            |
| Coping: avoidant (low)†                     | 12.4%            | 4.5%            | 3.7%            | 4.2%            | 35.1%            | 34.5%            |
| Coping: avoidant (high)†                    | 26.4%            | 12.0%           | 10.9%           | 11.9%           | 50.0%            | 53.6%            |
| Coping: socially-supported (low)†           | 16.4%            | 4.1%            | 4.7%            | 4.8%            | 29.0%            | 25.6%            |
| Coping: socially-supported (high)†          | 24.4%            | 14.2%           | 11.3%           | 12.9%           | 61.5%            | 69.7%            |
| Personality: openness to Experience (low)†  | 19.0%            | 6.9%            | 6.7%            | 6.6%            | 33.9%            | 37.6%            |
| Personality: openness to Experience (high)† | 20.9%            | 10.5%           | 8.5%            | 10.6%           | 54.9%            | 53.9%            |
| Personality: conscientiousness (low)†       | 21.3%            | 9.7%            | 8.0%            | 8.8%            | 42.2%            | 44.4%            |
| Personality: conscientiousness (high)†      | 18.0%            | 6.9%            | 7.0%            | 7.7%            | 44.0%            | 44.9%            |
| Personality: extraversion (low)†            | 23.3%            | 9.3%            | 8.0%            | 8.7%            | 42.1%            | 42.0%            |
| Personality: extraversion (high)†           | 16.0%            | 7.5%            | 7.0%            | 7.9%            | 44.1%            | 47.6%            |
| Personality: agreeableness (low)†           | 18.6%            | 8.1%            | 7.3%            | 7.3%            | 38.9%            | 39.9%            |
| Personality: agreeableness (high)†          | 21.2%            | 8.9%            | 7.8%            | 9.4%            | 47.7%            | 50.1%            |

|                                  |       |       |       |       |       |       |
|----------------------------------|-------|-------|-------|-------|-------|-------|
| Personality: neuroticism (low)†  | 10.3% | 3.5%  | 3.3%  | 3.5%  | 33.3% | 33.0% |
| Personality: neuroticism (high)† | 28.3% | 12.8% | 11.2% | 12.5% | 51.6% | 55.0% |

Notes: 1 Taking medication, 2 Speaking to mental health professionals, 3 Speaking to a GP or other health professionals, 4 Using helpline or other online services, 5 Self-care 6 Talking to family or friends; † Variables dichotomised at median.

Table S3 Frequencies of specific mental health conditions included in the alternative mental health diagnoses measure

| Diagnosis                      | N     |
|--------------------------------|-------|
| Schizophrenia                  | 21    |
| Bipolar disorder               | 148   |
| Manic depression               | 48    |
| Obsessive-compulsive disorder  | 215   |
| Post-traumatic stress disorder | 512   |
| Eating disorder                | 222   |
| Psychosis                      | 31    |
| Panic disorder                 | 290   |
| Anxiety                        | 3,370 |
| Depression                     | 3,112 |
| Other mental health condition  | 514   |
| Total number of conditions     | 8,483 |
| Total number of participants   | 4,864 |

Table S4 Cross-tabulation of two mental health measures

| Mental health diagnosis (original) | Mental health diagnosis (alternative) |                |                  |
|------------------------------------|---------------------------------------|----------------|------------------|
|                                    | No                                    | Yes            | Total            |
| No                                 | 16,160<br>90.5%                       | 1,699<br>9.5%  | 17,859<br>83.6%  |
| Yes                                | 344<br>9.8%                           | 3,165<br>90.2% | 3,509<br>16.4%   |
| Total                              | 16,504<br>77.2%                       | 4,864<br>22.8% | 21,368<br>100.0% |

Table S5. Results from logit model on each strategy to support mental health (using alternative mental health diagnosis measure)

|                                          | Model I:<br>Medication |                      | Model II: Mental<br>health<br>professionals |                    | Model III:<br>GP/other health<br>professionals |                    | Model IV:<br>Helpline/online<br>services |                    | Model V:<br>Self-care/help |                    | Model VI:<br>family/friends |                    |
|------------------------------------------|------------------------|----------------------|---------------------------------------------|--------------------|------------------------------------------------|--------------------|------------------------------------------|--------------------|----------------------------|--------------------|-----------------------------|--------------------|
|                                          | OR                     | 95% CI               | OR                                          | 95% CI             | OR                                             | 95% CI             | OR                                       | 95% CI             | OR                         | 95% CI             | OR                          | 95% CI             |
| 30-45 (VS. 18-29)                        | <b>2.26</b>            | <b>[1.55,3.30]</b>   | 0.76                                        | [0.53,1.10]        | 1.08                                           | [0.72,1.63]        | 1.21                                     | [0.83,1.75]        | 0.83                       | [0.63,1.09]        | 0.80                        | [0.58,1.09]        |
| 46-59 (VS. 18-29)                        | <b>2.84</b>            | <b>[1.95,4.14]</b>   | <b>0.64</b>                                 | <b>[0.44,0.91]</b> | 0.97                                           | [0.65,1.45]        | 1.04                                     | [0.74,1.46]        | <b>0.60</b>                | <b>[0.46,0.78]</b> | <b>0.54</b>                 | <b>[0.40,0.74]</b> |
| 60+ (VS. 18-29)                          | <b>2.52</b>            | <b>[1.68,3.77]</b>   | <b>0.31</b>                                 | <b>[0.20,0.48]</b> | 0.75                                           | [0.48,1.16]        | 0.71                                     | [0.49,1.03]        | <b>0.31</b>                | <b>[0.23,0.41]</b> | <b>0.31</b>                 | <b>[0.22,0.42]</b> |
| Women (VS. men)                          | 1.09                   | [0.87,1.37]          | 0.95                                        | [0.68,1.31]        | 0.88                                           | [0.65,1.18]        | 0.82                                     | [0.62,1.08]        | <b>1.96</b>                | <b>[1.71,2.26]</b> | <b>1.41</b>                 | <b>[1.22,1.62]</b> |
| Ethnic minority (VS. white)              | 0.63                   | [0.39,1.00]          | 1.18                                        | [0.69,2.01]        | 1.01                                           | [0.65,1.59]        | 1.43                                     | [0.94,2.18]        | 1.14                       | [0.82,1.59]        | 1.11                        | [0.83,1.50]        |
| Education medium (VS. low)               | 0.80                   | [0.64,1.02]          | 1.16                                        | [0.80,1.69]        | 1.02                                           | [0.74,1.40]        | <b>1.45</b>                              | <b>[1.05,1.99]</b> | <b>1.37</b>                | <b>[1.13,1.66]</b> | <b>1.32</b>                 | <b>[1.09,1.61]</b> |
| Education high (VS. low)                 | <b>0.78</b>            | <b>[0.62,0.99]</b>   | <b>1.67</b>                                 | <b>[1.19,2.34]</b> | 0.94                                           | [0.68,1.29]        | <b>1.56</b>                              | <b>[1.15,2.11]</b> | <b>2.03</b>                | <b>[1.67,2.47]</b> | <b>1.50</b>                 | <b>[1.24,1.82]</b> |
| Employed (VS. Not employed)              | <b>0.78</b>            | <b>[0.63,0.96]</b>   | 0.89                                        | [0.66,1.19]        | 0.82                                           | [0.61,1.11]        | 1.06                                     | [0.81,1.37]        | 1.01                       | [0.86,1.18]        | <b>1.26</b>                 | <b>[1.06,1.49]</b> |
| Income <30k (VS. ≥30k)                   | 1.05                   | [0.85,1.30]          | 0.77                                        | [0.58,1.02]        | 1.08                                           | [0.80,1.46]        | 1.18                                     | [0.91,1.52]        | 1.00                       | [0.85,1.17]        | 0.99                        | [0.84,1.17]        |
| Rural (VS. urban)                        | 1.09                   | [0.90,1.32]          | 1.13                                        | [0.84,1.53]        | 1.07                                           | [0.80,1.42]        | 0.99                                     | [0.77,1.27]        | 1.03                       | [0.90,1.18]        | 1.05                        | [0.91,1.20]        |
| Living with children (VS. alone)         | 1.00                   | [0.74,1.35]          | <b>0.66</b>                                 | <b>[0.46,0.95]</b> | 1.14                                           | [0.78,1.65]        | 1.08                                     | [0.74,1.56]        | <b>0.66</b>                | <b>[0.54,0.82]</b> | <b>0.64</b>                 | <b>[0.52,0.79]</b> |
| Living with others, no child (VS. alone) | 0.85                   | [0.68,1.07]          | <b>0.58</b>                                 | <b>[0.43,0.78]</b> | 0.88                                           | [0.66,1.18]        | 0.91                                     | [0.69,1.20]        | 0.89                       | [0.76,1.05]        | <b>0.72</b>                 | <b>[0.61,0.85]</b> |
| Close friends <3 (VS. ≥3)                | <b>1.26</b>            | <b>[1.03,1.56]</b>   | 1.18                                        | [0.86,1.60]        | 0.79                                           | [0.60,1.04]        | 0.97                                     | [0.71,1.32]        | 0.98                       | [0.84,1.14]        | 0.89                        | [0.76,1.06]        |
| Loneliness                               | 1.00                   | [0.94,1.07]          | <b>1.17</b>                                 | <b>[1.08,1.27]</b> | <b>1.19</b>                                    | <b>[1.10,1.28]</b> | <b>1.15</b>                              | <b>[1.08,1.24]</b> | <b>1.09</b>                | <b>[1.04,1.14]</b> | 1.01                        | [0.96,1.06]        |
| Mental health diagnosis (VS. none)       | <b>23.68</b>           | <b>[18.82,29.81]</b> | <b>5.99</b>                                 | <b>[4.50,7.97]</b> | <b>4.67</b>                                    | <b>[3.42,6.38]</b> | <b>3.53</b>                              | <b>[2.68,4.64]</b> | <b>1.78</b>                | <b>[1.50,2.11]</b> | <b>2.02</b>                 | <b>[1.69,2.42]</b> |
| Depression (PHQ-9)                       | <b>1.08</b>            | <b>[1.05,1.11]</b>   | <b>1.03</b>                                 | <b>[1.00,1.07]</b> | 1.03                                           | [1.00,1.07]        | <b>1.04</b>                              | <b>[1.01,1.07]</b> | 1.01                       | [0.99,1.03]        | <b>1.04</b>                 | <b>[1.01,1.06]</b> |
| Anxiety (GAD-7)                          | 0.97                   | [0.94,1.00]          | 1.03                                        | [0.99,1.07]        | <b>1.05</b>                                    | <b>[1.02,1.09]</b> | <b>1.06</b>                              | <b>[1.02,1.09]</b> | <b>1.03</b>                | <b>[1.00,1.05]</b> | <b>1.05</b>                 | <b>[1.02,1.07]</b> |
| Coping: problem-focused                  | <b>0.78</b>            | <b>[0.62,0.97]</b>   | 0.88                                        | [0.67,1.16]        | 1.13                                           | [0.87,1.47]        | <b>1.32</b>                              | <b>[1.02,1.72]</b> | <b>1.98</b>                | <b>[1.65,2.39]</b> | 1.10                        | [0.92,1.30]        |
| Coping: emotion-focused                  | 1.08                   | [0.92,1.27]          | 1.16                                        | [0.93,1.46]        | 1.02                                           | [0.82,1.26]        | 1.21                                     | [0.99,1.48]        | <b>1.49</b>                | <b>[1.31,1.69]</b> | 0.99                        | [0.87,1.13]        |
| Coping: avoidant                         | <b>1.30</b>            | <b>[1.07,1.57]</b>   | 1.06                                        | [0.83,1.36]        | <b>1.30</b>                                    | <b>[1.04,1.63]</b> | 1.07                                     | [0.86,1.33]        | 0.91                       | [0.78,1.05]        | 0.95                        | [0.80,1.12]        |
| Coping: socially-supported               | <b>1.34</b>            | <b>[1.15,1.57]</b>   | <b>2.14</b>                                 | <b>[1.75,2.60]</b> | <b>1.66</b>                                    | <b>[1.37,2.02]</b> | <b>1.58</b>                              | <b>[1.30,1.92]</b> | <b>1.71</b>                | <b>[1.52,1.92]</b> | <b>4.18</b>                 | <b>[3.66,4.78]</b> |
| Personality: openness to Experience      | 0.95                   | [0.78,1.17]          | 1.02                                        | [0.81,1.29]        | 1.04                                           | [0.81,1.33]        | 0.99                                     | [0.79,1.24]        | <b>1.65</b>                | <b>[1.43,1.90]</b> | 1.06                        | [0.91,1.23]        |
| Personality: conscientiousness           | 1.05                   | [0.89,1.24]          | 0.94                                        | [0.77,1.15]        | 1.05                                           | [0.86,1.28]        | 0.86                                     | [0.72,1.04]        | 0.92                       | [0.81,1.04]        | 0.95                        | [0.84,1.08]        |
| Personality: extraversion                | 0.90                   | [0.77,1.05]          | 1.05                                        | [0.84,1.31]        | 0.96                                           | [0.78,1.19]        | 1.08                                     | [0.88,1.32]        | 0.92                       | [0.83,1.03]        | <b>1.31</b>                 | <b>[1.16,1.48]</b> |
| Personality: agreeableness               | 1.31                   | [0.96,1.80]          | 1.01                                        | [0.67,1.51]        | 1.04                                           | [0.70,1.55]        | <b>1.54</b>                              | <b>[1.03,2.29]</b> | 1.17                       | [0.93,1.48]        | <b>1.34</b>                 | <b>[1.04,1.71]</b> |
| Personality: neuroticism                 | 1.07                   | [0.90,1.26]          | 1.06                                        | [0.84,1.34]        | 1.10                                           | [0.89,1.36]        | 0.96                                     | [0.77,1.20]        | 1.08                       | [0.95,1.22]        | <b>1.17</b>                 | <b>[1.03,1.33]</b> |

Table S6. Results from logit model on each strategy to support mental health (no pre-existing mental health condition, N= 22,113)

|                                          | Model I:<br>Medication |                    | Model II: Mental<br>health<br>professionals |                    | Model III:<br>GP/other health<br>professionals |                    | Model IV:<br>Helpline/online<br>services |                    | Model V:<br>Self-care/help |                    | Model VI:<br>family/friends |                    |
|------------------------------------------|------------------------|--------------------|---------------------------------------------|--------------------|------------------------------------------------|--------------------|------------------------------------------|--------------------|----------------------------|--------------------|-----------------------------|--------------------|
|                                          | OR                     | 95% CI             | OR                                          | 95% CI             | OR                                             | 95% CI             | OR                                       | 95% CI             | OR                         | 95% CI             | OR                          | 95% CI             |
| 30-45 (VS. 18-29)                        | 1.49                   | [0.95,2.33]        | 0.91                                        | [0.63,1.33]        | 0.88                                           | [0.51,1.52]        | 1.07                                     | [0.69,1.65]        | 0.82                       | [0.64,1.05]        | 0.80                        | [0.61,1.06]        |
| 46-59 (VS. 18-29)                        | <b>1.89</b>            | <b>[1.21,2.96]</b> | 0.77                                        | [0.48,1.22]        | 0.63                                           | [0.32,1.26]        | 0.85                                     | [0.58,1.24]        | <b>0.66</b>                | <b>[0.51,0.85]</b> | <b>0.53</b>                 | <b>[0.40,0.70]</b> |
| 60+ (VS. 18-29)                          | 1.50                   | [0.93,2.42]        | 0.48                                        | [0.23,1.02]        | 0.65                                           | [0.30,1.42]        | 0.76                                     | [0.49,1.15]        | <b>0.34</b>                | <b>[0.26,0.45]</b> | <b>0.32</b>                 | <b>[0.24,0.43]</b> |
| Women (VS. men)                          | 1.00                   | [0.79,1.28]        | 0.97                                        | [0.68,1.39]        | 0.72                                           | [0.47,1.10]        | 0.97                                     | [0.71,1.34]        | <b>2.08</b>                | <b>[1.81,2.39]</b> | <b>1.43</b>                 | <b>[1.24,1.65]</b> |
| Ethnic minority (VS. white)              | 0.81                   | [0.52,1.29]        | 1.48                                        | [0.93,2.37]        | 1.49                                           | [0.69,3.19]        | <b>1.77</b>                              | <b>[1.08,2.92]</b> | 1.06                       | [0.80,1.42]        | 0.92                        | [0.70,1.21]        |
| Education medium (VS. low)               | <b>0.76</b>            | <b>[0.58,1.00]</b> | 1.18                                        | [0.64,2.19]        | 1.39                                           | [0.84,2.32]        | <b>1.73</b>                              | <b>[1.01,2.95]</b> | <b>1.32</b>                | <b>[1.07,1.62]</b> | <b>1.28</b>                 | <b>[1.04,1.59]</b> |
| Education high (VS. low)                 | <b>0.66</b>            | <b>[0.51,0.87]</b> | 1.62                                        | [0.96,2.72]        | 0.84                                           | [0.54,1.30]        | 1.37                                     | [0.78,2.39]        | <b>2.06</b>                | <b>[1.67,2.54]</b> | <b>1.48</b>                 | <b>[1.19,1.82]</b> |
| Employed (VS. Not employed)              | 1.05                   | [0.83,1.34]        | 1.14                                        | [0.79,1.66]        | 0.99                                           | [0.60,1.63]        | 1.27                                     | [0.92,1.76]        | 1.07                       | [0.90,1.26]        | 1.18                        | [0.99,1.40]        |
| Income <30k (VS. ≥30k)                   | <b>1.61</b>            | <b>[1.28,2.04]</b> | 1.04                                        | [0.75,1.46]        | 1.36                                           | [0.80,2.32]        | 1.06                                     | [0.77,1.45]        | 0.97                       | [0.83,1.13]        | 0.93                        | [0.79,1.10]        |
| Rural (VS. urban)                        | 1.24                   | [1.00,1.53]        | 1.13                                        | [0.78,1.66]        | 0.97                                           | [0.65,1.46]        | 0.83                                     | [0.61,1.13]        | 0.99                       | [0.87,1.13]        | 0.92                        | [0.80,1.06]        |
| Living with children (VS. alone)         | 0.99                   | [0.71,1.40]        | <b>0.63</b>                                 | <b>[0.41,0.98]</b> | 1.12                                           | [0.66,1.91]        | 0.95                                     | [0.63,1.44]        | <b>0.67</b>                | <b>[0.55,0.82]</b> | <b>0.75</b>                 | <b>[0.61,0.92]</b> |
| Living with others, no child (VS. alone) | 1.14                   | [0.88,1.47]        | 0.82                                        | [0.56,1.19]        | 1.10                                           | [0.77,1.58]        | 1.01                                     | [0.70,1.47]        | 0.92                       | [0.78,1.08]        | <b>0.73</b>                 | <b>[0.62,0.86]</b> |
| Close friends <3 (VS. ≥3)                | 1.09                   | [0.86,1.39]        | 0.98                                        | [0.62,1.54]        | 1.27                                           | [0.72,2.23]        | 1.29                                     | [0.85,1.94]        | 0.95                       | [0.81,1.12]        | 0.92                        | [0.77,1.09]        |
| Loneliness                               | 1.08                   | [1.00,1.16]        | <b>1.30</b>                                 | <b>[1.18,1.44]</b> | <b>1.20</b>                                    | <b>[1.09,1.31]</b> | <b>1.21</b>                              | <b>[1.10,1.34]</b> | <b>1.09</b>                | <b>[1.05,1.14]</b> | 1.05                        | [1.00,1.10]        |
| Mental health diagnosis (VS. none)       | --                     | --                 | --                                          | --                 | --                                             | --                 | --                                       | --                 | --                         | --                 | --                          | --                 |
| Depression (PHQ-9)                       | <b>1.07</b>            | <b>[1.04,1.10]</b> | 1.04                                        | [1.00,1.09]        | 1.03                                           | [0.99,1.07]        | 1.03                                     | [0.99,1.07]        | 1.00                       | [0.98,1.03]        | <b>1.04</b>                 | <b>[1.02,1.07]</b> |
| Anxiety (GAD-7)                          | 1.00                   | [0.97,1.04]        | 1.01                                        | [0.96,1.06]        | <b>1.06</b>                                    | <b>[1.02,1.11]</b> | 1.04                                     | [1.00,1.08]        | <b>1.03</b>                | <b>[1.01,1.06]</b> | <b>1.04</b>                 | <b>[1.02,1.07]</b> |
| Coping: problem-focused                  | 0.86                   | [0.64,1.17]        | 0.77                                        | [0.55,1.08]        | <b>1.42</b>                                    | <b>[1.03,1.95]</b> | 1.36                                     | [0.98,1.89]        | <b>1.91</b>                | <b>[1.59,2.29]</b> | <b>1.22</b>                 | <b>[1.03,1.45]</b> |
| Coping: emotion-focused                  | 1.19                   | [0.98,1.46]        | 1.06                                        | [0.79,1.40]        | 0.81                                           | [0.62,1.06]        | 0.93                                     | [0.66,1.30]        | <b>1.35</b>                | <b>[1.20,1.53]</b> | 0.96                        | [0.84,1.09]        |
| Coping: avoidant                         | <b>1.27</b>            | <b>[1.03,1.57]</b> | 1.10                                        | [0.75,1.61]        | 1.07                                           | [0.70,1.63]        | 1.06                                     | [0.81,1.39]        | <b>0.80</b>                | <b>[0.69,0.93]</b> | 0.89                        | [0.75,1.05]        |
| Coping: socially-supported               | <b>1.39</b>            | <b>[1.14,1.68]</b> | <b>2.89</b>                                 | <b>[2.33,3.59]</b> | <b>1.78</b>                                    | <b>[1.29,2.45]</b> | <b>1.95</b>                              | <b>[1.55,2.45]</b> | <b>1.84</b>                | <b>[1.64,2.06]</b> | <b>3.90</b>                 | <b>[3.43,4.44]</b> |
| Personality: openness to Experience      | 0.92                   | [0.75,1.14]        | <b>1.35</b>                                 | <b>[1.01,1.81]</b> | 1.01                                           | [0.72,1.41]        | 1.18                                     | [0.88,1.59]        | <b>1.75</b>                | <b>[1.52,2.02]</b> | 1.16                        | [1.00,1.35]        |
| Personality: conscientiousness           | 0.98                   | [0.80,1.20]        | 1.03                                        | [0.81,1.31]        | 1.38                                           | [0.92,2.06]        | 0.99                                     | [0.80,1.23]        | 0.90                       | [0.79,1.02]        | 0.95                        | [0.83,1.08]        |
| Personality: extraversion                | 1.00                   | [0.84,1.18]        | 1.08                                        | [0.81,1.44]        | 1.28                                           | [0.91,1.81]        | 1.03                                     | [0.80,1.33]        | <b>0.84</b>                | <b>[0.75,0.94]</b> | <b>1.33</b>                 | <b>[1.18,1.50]</b> |
| Personality: agreeableness               | 1.33                   | [0.88,2.03]        | 0.88                                        | [0.51,1.49]        | <b>0.50</b>                                    | <b>[0.27,0.95]</b> | 1.49                                     | [0.93,2.38]        | 1.20                       | [0.96,1.50]        | <b>1.30</b>                 | <b>[1.02,1.67]</b> |
| Personality: neuroticism                 | <b>1.36</b>            | <b>[1.12,1.64]</b> | <b>1.42</b>                                 | <b>[1.01,1.99]</b> | <b>1.42</b>                                    | <b>[1.02,1.97]</b> | <b>1.39</b>                              | <b>[1.02,1.87]</b> | 1.03                       | [0.92,1.16]        | <b>1.21</b>                 | <b>[1.06,1.37]</b> |

Table S7. Results from logit model on each strategy to support mental health (with pre-existing mental health condition, N=4,607)

|                                          | Model I:<br>Medication |                    | Model II: Mental<br>health<br>professionals |                    | Model III:<br>GP/other health<br>professionals |                    | Model IV:<br>Helpline/online<br>services |                    | Model V:<br>Self-care/help |                    | Model VI:<br>family/friends |                    |
|------------------------------------------|------------------------|--------------------|---------------------------------------------|--------------------|------------------------------------------------|--------------------|------------------------------------------|--------------------|----------------------------|--------------------|-----------------------------|--------------------|
|                                          | OR                     | 95% CI             | OR                                          | 95% CI             | OR                                             | 95% CI             | OR                                       | 95% CI             | OR                         | 95% CI             | OR                          | 95% CI             |
| 30-45 (VS. 18-29)                        | <b>1.89</b>            | <b>[1.31,2.73]</b> | 0.67                                        | [0.45,1.00]        | 1.14                                           | [0.75,1.74]        | 1.18                                     | [0.78,1.80]        | 0.87                       | [0.58,1.31]        | 0.85                        | [0.54,1.33]        |
| 46-59 (VS. 18-29)                        | <b>3.12</b>            | <b>[2.10,4.64]</b> | <b>0.55</b>                                 | <b>[0.36,0.83]</b> | 1.44                                           | [0.93,2.22]        | 1.15                                     | [0.76,1.73]        | <b>0.53</b>                | <b>[0.35,0.79]</b> | 0.82                        | [0.53,1.28]        |
| 60+ (VS. 18-29)                          | <b>3.45</b>            | <b>[2.17,5.49]</b> | <b>0.23</b>                                 | <b>[0.14,0.38]</b> | 0.66                                           | [0.40,1.09]        | 0.71                                     | [0.44,1.15]        | <b>0.34</b>                | <b>[0.22,0.54]</b> | <b>0.44</b>                 | <b>[0.27,0.70]</b> |
| Women (VS. men)                          | 1.12                   | [0.81,1.56]        | 0.87                                        | [0.59,1.29]        | 0.93                                           | [0.64,1.35]        | 0.73                                     | [0.51,1.04]        | <b>1.80</b>                | <b>[1.35,2.40]</b> | 1.07                        | [0.80,1.44]        |
| Ethnic minority (VS. white)              | <b>0.58</b>            | <b>[0.35,0.99]</b> | 0.93                                        | [0.50,1.72]        | 0.82                                           | [0.44,1.54]        | 1.62                                     | [0.96,2.75]        | 0.81                       | [0.46,1.42]        | 1.14                        | [0.61,2.12]        |
| Education medium (VS. low)               | 0.82                   | [0.55,1.21]        | 1.04                                        | [0.68,1.59]        | 0.99                                           | [0.67,1.45]        | 1.24                                     | [0.85,1.81]        | 1.27                       | [0.93,1.74]        | 1.23                        | [0.86,1.77]        |
| Education high (VS. low)                 | 0.87                   | [0.59,1.28]        | 1.29                                        | [0.87,1.93]        | 1.05                                           | [0.71,1.54]        | <b>1.48</b>                              | <b>[1.02,2.13]</b> | <b>1.76</b>                | <b>[1.27,2.43]</b> | 1.31                        | [0.92,1.88]        |
| Employed (VS. Not employed)              | <b>0.71</b>            | <b>[0.53,0.96]</b> | 0.75                                        | [0.55,1.03]        | <b>0.72</b>                                    | <b>[0.52,0.99]</b> | 0.79                                     | [0.58,1.08]        | 1.11                       | [0.82,1.51]        | 1.16                        | [0.87,1.56]        |
| Income <30k (VS. ≥30k)                   | 0.86                   | [0.64,1.15]        | <b>0.69</b>                                 | <b>[0.50,0.96]</b> | 0.87                                           | [0.62,1.22]        | 1.06                                     | [0.77,1.47]        | 0.97                       | [0.71,1.32]        | 1.00                        | [0.74,1.37]        |
| Rural (VS. urban)                        | 0.99                   | [0.69,1.42]        | 1.30                                        | [0.90,1.88]        | 1.05                                           | [0.76,1.46]        | 1.23                                     | [0.88,1.71]        | 1.05                       | [0.78,1.42]        | 1.06                        | [0.75,1.50]        |
| Living with children (VS. alone)         | 1.10                   | [0.74,1.65]        | <b>0.59</b>                                 | <b>[0.38,0.90]</b> | 0.79                                           | [0.51,1.22]        | 1.06                                     | [0.69,1.63]        | <b>0.62</b>                | <b>[0.41,0.93]</b> | <b>0.52</b>                 | <b>[0.34,0.78]</b> |
| Living with others, no child (VS. alone) | 0.84                   | [0.60,1.20]        | <b>0.59</b>                                 | <b>[0.42,0.83]</b> | 0.70                                           | [0.48,1.02]        | 0.93                                     | [0.64,1.36]        | 0.82                       | [0.59,1.14]        | 0.76                        | [0.53,1.08]        |
| Close friends <3 (VS. ≥3)                | 1.04                   | [0.77,1.42]        | <b>1.42</b>                                 | <b>[1.01,1.99]</b> | 0.96                                           | [0.69,1.34]        | 0.85                                     | [0.62,1.18]        | 0.98                       | [0.74,1.28]        | 0.78                        | [0.58,1.05]        |
| Loneliness                               | 1.03                   | [0.95,1.12]        | 1.08                                        | [0.99,1.18]        | 1.07                                           | [0.98,1.16]        | <b>1.11</b>                              | <b>[1.03,1.21]</b> | 1.07                       | [0.99,1.15]        | 0.95                        | [0.87,1.03]        |
| Mental health diagnosis (VS. none)       | --                     | --                 | --                                          | --                 | --                                             | --                 | --                                       | --                 | --                         | --                 | --                          | --                 |
| Depression (PHQ-9)                       | 1.03                   | [1.00,1.07]        | 1.03                                        | [0.99,1.07]        | 1.02                                           | [0.99,1.06]        | 1.03                                     | [0.99,1.07]        | 0.98                       | [0.95,1.01]        | 1.01                        | [0.98,1.05]        |
| Anxiety (GAD-7)                          | 0.98                   | [0.94,1.01]        | 1.02                                        | [0.98,1.07]        | <b>1.08</b>                                    | <b>[1.04,1.12]</b> | 1.05                                     | [1.01,1.09]        | 1.02                       | [0.98,1.06]        | 1.05                        | [1.01,1.09]        |
| Coping: problem-focused                  | 0.76                   | [0.55,1.06]        | 0.93                                        | [0.66,1.32]        | 0.94                                           | [0.67,1.32]        | 1.04                                     | [0.73,1.47]        | <b>1.39</b>                | <b>[1.02,1.89]</b> | 0.79                        | [0.57,1.10]        |
| Coping: emotion-focused                  | 1.03                   | [0.81,1.32]        | 1.07                                        | [0.81,1.42]        | 1.03                                           | [0.79,1.32]        | <b>1.38</b>                              | <b>[1.04,1.84]</b> | <b>2.03</b>                | <b>[1.60,2.58]</b> | 1.18                        | [0.93,1.52]        |
| Coping: avoidant                         | <b>1.52</b>            | <b>[1.18,1.97]</b> | 1.09                                        | [0.82,1.45]        | <b>1.32</b>                                    | <b>[1.02,1.72]</b> | 1.26                                     | [0.97,1.63]        | <b>1.41</b>                | <b>[1.11,1.80]</b> | 1.05                        | [0.81,1.38]        |
| Coping: socially-supported               | 1.20                   | [0.96,1.50]        | <b>2.14</b>                                 | <b>[1.68,2.75]</b> | <b>1.59</b>                                    | <b>[1.25,2.02]</b> | <b>1.52</b>                              | <b>[1.19,1.93]</b> | <b>1.43</b>                | <b>[1.14,1.80]</b> | <b>5.85</b>                 | <b>[4.50,7.60]</b> |
| Personality: openness to Experience      | 0.86                   | [0.68,1.10]        | 0.88                                        | [0.67,1.14]        | 0.85                                           | [0.65,1.11]        | 0.83                                     | [0.65,1.07]        | <b>1.89</b>                | <b>[1.49,2.40]</b> | 1.03                        | [0.80,1.33]        |
| Personality: conscientiousness           | 1.10                   | [0.87,1.38]        | 0.84                                        | [0.67,1.06]        | 0.94                                           | [0.75,1.17]        | 0.92                                     | [0.73,1.15]        | 0.90                       | [0.73,1.11]        | 0.86                        | [0.69,1.08]        |
| Personality: extraversion                | 1.00                   | [0.80,1.26]        | 1.16                                        | [0.92,1.46]        | 1.17                                           | [0.93,1.47]        | 1.24                                     | [1.00,1.53]        | 1.03                       | [0.83,1.28]        | <b>1.52</b>                 | <b>[1.20,1.92]</b> |
| Personality: agreeableness               | 1.30                   | [0.84,2.02]        | 1.26                                        | [0.79,2.02]        | 1.14                                           | [0.73,1.79]        | 1.39                                     | [0.87,2.21]        | 1.23                       | [0.80,1.90]        | 1.37                        | [0.89,2.12]        |
| Personality: neuroticism                 | <b>0.75</b>            | <b>[0.58,0.97]</b> | 1.08                                        | [0.79,1.47]        | 0.90                                           | [0.69,1.17]        | 1.15                                     | [0.89,1.48]        | 1.22                       | [0.95,1.56]        | 1.22                        | [0.95,1.56]        |
